# Supplementary material for: Molecular Topology for the Search of New Anti-MRSA Compounds
Source: MDPI journal article supplement (doi:10.3390/ijms22115823), 2021-05-29
Supplement: s1 [file s1]

**Table S2. Inactive group used in the discriminant functions: Paper name/code, IUPAC name, structure and bibliographic references about activity for each compound.**

| Paper name/code | IUPAC name                                                                                                                                    | Structure | References                                                                                                                                                                                                                                                                                        |
|-----------------|-----------------------------------------------------------------------------------------------------------------------------------------------|-----------|---------------------------------------------------------------------------------------------------------------------------------------------------------------------------------------------------------------------------------------------------------------------------------------------------|
| 5i-in1          | (E)-7-(4-(2-(2,4-difluorophenyl)-2-(methoxyimino)ethyl)piperazin-1-yl)-1-ethyl-6-fluoro-4-oxo-1,4-dihydro-1,8-naphthyridine-3-carboxylic acid |           | Foroumadi A, Ghodsi S, Emami S, Najjari S, Samadi N, Faramarzi MA, Beikmohammadi L, Shirazi FH, Shafiee A. Synthesis and antibacterial activity of new fluoroquinolones containing a substituted N-(phenethyl)piperazine moiety. <i>Bioorg. Med. Chem. Lett.</i> <b>2006</b> ; 16(13): 3499-3503. |
| in6-7c          | 5-ethyl-6-hydroxy-8-oxo-5,8-dihydro-[1,3]dioxolo[4,5-g]quinoline-7-carboxylic acid                                                            |           | Mitscher LA, Gracey HE, Clark GW 3rd, Suzuki T. Quinolone antimicrobial agents. 1. Versatile new synthesis of 1-alkyl-1,4-dihydro-4-oxo-3-quinolinecarboxylic acids. <i>J. Med. Chem.</i> <b>1978</b> ; 21(5): 485-9.                                                                             |
| in6-7e          | 5-ethyl-6-methyl-8-oxo-5,8-dihydro-[1,3]dioxolo[4,5-g]quinoline-7-carboxylic acid                                                             |           | Idem                                                                                                                                                                                                                                                                                              |
| in6-11a         | 1-ethyl-6-methyl-4-oxo-1,2,3,4-tetrahydroquinoline-3-carboxylic acid                                                                          |           | Idem                                                                                                                                                                                                                                                                                              |
| in6-11c         | 1-ethyl-8-methyl-4-oxo-1,2,3,4-tetrahydroquinoline-3-carboxylic acid                                                                          |           | Idem                                                                                                                                                                                                                                                                                              |
| in2-4b          | 1-(2-(difluoro(hydroxy)methyl)phenyl)-6-fluoro-7-(4-methylpiperazin-1-yl)-4-oxo-1,4-dihydroquinoline-3-carboxylic acid                        |           | Xiao W, Krishnan R, Lin YI, Delos Santos EF, Kuck NA, Babine RE, Lang SA Jr. Synthesis and in vitro antibacterial activity of some 1-(difluoromethoxyphenyl)quinolone-3-carboxylic acids. <i>J. Pharm. Sci.</i> <b>1989</b> ; 78(7): 585-8.                                                       |

|           |                                                                                                                             |  |                                                                                                                                                                                                                           |
|-----------|-----------------------------------------------------------------------------------------------------------------------------|--|---------------------------------------------------------------------------------------------------------------------------------------------------------------------------------------------------------------------------|
| in2-4e    | 1-(3,4-bis(difluoro(hydroxy)methyl)phenyl)-6-fluoro-4-oxo-7-(piperazin-1-yl)-1,4-dihydroquinoline-3-carboxylic acid         |  | Idem                                                                                                                                                                                                                      |
| in2-4f    | 1-(3,4-bis(difluoro(hydroxy)methyl)phenyl)-6-fluoro-7-(4-methylpiperazin-1-yl)-4-oxo-1,4-dihydroquinoline-3-carboxylic acid |  | Idem                                                                                                                                                                                                                      |
| in10-4Ib  | 7-(2,3-dimethylthiazolidin-4-yl)-1-ethyl-4-oxo-1,4-dihydroquinoline-3-carboxylic acid                                       |  | Zhang M, Haemers A, Vanden Berghe D, Pattyn S, Bollaert W, Levshin I. Quinolone antibacterials. 1. 7-(2-Substituted-4-thiazolyl- and thiazolidinyl)quinolones. <i>J. Heterocyclic Chem.</i> <b>1991</b> ; 22(38): 673-83. |
| in10-4IIa | 1-ethyl-6-fluoro-7-(3-methylthiazolidin-4-yl)-4-oxo-1,4-dihydroquinoline-3-carboxylic acid                                  |  | Idem                                                                                                                                                                                                                      |
| in10-4IIb | 7-(2,3-dimethylthiazolidin-4-yl)-1-ethyl-6-fluoro-4-oxo-1,4-dihydroquinoline-3-carboxylic acid                              |  | Idem                                                                                                                                                                                                                      |
| in9-4     | 7-ethyl-3-methyl-4-oxo-4,7-dihydroisothiazolo[5,4-b]pyridine-5-carboxylic acid                                              |  | Richardson TO; Neale N, Carwell N. Synthesis and antibacterial activity of 7-ethyl-3-methyl-4,7-dihydro-4-oxoisothiazolo[5,4-b]pyridine-5-carboxylic acid. <i>J. Heterocyclic Chem.</i> <b>1995</b> ; 32(1): 359-61       |

|         |                                                                                                                                             |  |                                                                                                                                                                                                                                                           |
|---------|---------------------------------------------------------------------------------------------------------------------------------------------|--|-----------------------------------------------------------------------------------------------------------------------------------------------------------------------------------------------------------------------------------------------------------|
| in1-21a | 7-amino-4-(4-methoxyphenyl)-5-methyl-6-(4-methylpiperazin-1-yl)-1-oxo-1,4-dihydronaphthalene-2-carboxylic acid                              |  | Cecchetti V, Fravolini A, Lorenzini MC, Tabarrini O, Terni P, Xin T. Studies on 6-aminoquinolones: synthesis and antibacterial evaluation of 6-amino-8-methylquinolones. <i>J. Med. Chem.</i> <b>1996</b> ; 39(2): 436-45.                                |
| in1-27j | 1-cyclopropyl-6-(dimethylamino)-8-methyl-7-(4-methylpiperidin-1-yl)-4-oxo-1,4-dihydroquinoline-3-carboxylic acid                            |  | Idem                                                                                                                                                                                                                                                      |
| in4-2a  | 7-amino-4-cyclopropyl-5-ethyl-6-(4-methylpiperazin-1-yl)-1-oxo-1,4-dihydronaphthalene-2-carboxylic acid                                     |  | Cecchetti V, Tabarrini O, Sabatini S, Miao H, Filipponi E, Fravolini A. Studies on 6-aminoquinolones: synthesis and antibacterial evaluation of 6-amino-8-ethyl- and 6-amino-8-methoxyquinolones. <i>Bioorg. Med. Chem.</i> <b>1999</b> ; 7(11): 2465-71. |
| in5-5d  | 1-cyclopropyl-6-fluoro-7-(4-(5-(2-nitrophenyl)-1,3,4-thiadiazol-2-yl)piperazin-1-yl)-4-oxo-1,2,3,4-tetrahydroquinoline-3-carboxylic acid    |  | Foroumadi A, Soltani F, Moshafi MH, Ashraf-Askari R. Synthesis and in vitro antibacterial activity of some N-(5-aryl-1,3,4-thiadiazole-2-yl)piperazinyl quinolone derivatives. <i>Il Farmaco</i> <b>2003</b> ; 58 (10): 1023-8.                           |
| in5-5e  | 1-ethyl-6-fluoro-7-(4-(5-(2-nitrophenyl)-1,3,4-thiadiazol-2-yl)piperazin-1-yl)-4-oxo-1,2,3,4-tetrahydroquinoline-3-carboxylic acid          |  | Idem                                                                                                                                                                                                                                                      |
| in5-5f  | 1-ethyl-6-fluoro-7-(4-(5-(2-nitrophenyl)-1,3,4-thiadiazol-2-yl)piperazin-1-yl)-4-oxo-1,2,3,4-tetrahydro-1,8-naphthyridine-3-carboxylic acid |  | Idem                                                                                                                                                                                                                                                      |

|        |                                                                                                                                             |                                                                                      |      |
|--------|---------------------------------------------------------------------------------------------------------------------------------------------|--------------------------------------------------------------------------------------|------|
| in5-5g | 1-cyclopropyl-6-fluoro-7-(4-(5-(3-nitrophenyl)-1,3,4-thiadiazol-2-yl)piperazin-1-yl)-4-oxo-1,2,3,4-tetrahydroquinoline-3-carboxylic acid    | 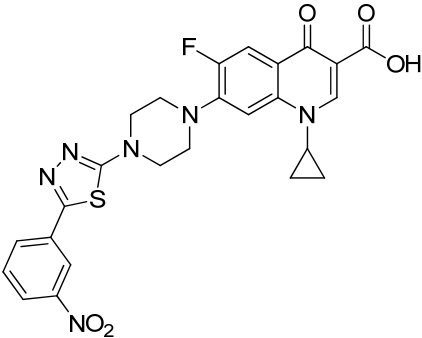   | Idem |
| in5-5h | 1-ethyl-6-fluoro-7-(4-(5-(3-nitrophenyl)-1,3,4-thiadiazol-2-yl)piperazin-1-yl)-4-oxo-1,2,3,4-tetrahydroquinoline-3-carboxylic acid          |    | Idem |
| in5-5i | 1-ethyl-6-fluoro-7-(4-(5-(3-nitrophenyl)-1,3,4-thiadiazol-2-yl)piperazin-1-yl)-4-oxo-1,2,3,4-tetrahydro-1,8-naphthyridine-3-carboxylic acid |   | Idem |
| in5-5j | 1-cyclopropyl-6-fluoro-7-(4-(5-(4-nitrophenyl)-1,3,4-thiadiazol-2-yl)piperazin-1-yl)-4-oxo-1,2,3,4-tetrahydroquinoline-3-carboxylic acid    |  | Idem |

|          |                                                                                                                                             |  |                                                                                                                                                                                                                                                                                                                   |
|----------|---------------------------------------------------------------------------------------------------------------------------------------------|--|-------------------------------------------------------------------------------------------------------------------------------------------------------------------------------------------------------------------------------------------------------------------------------------------------------------------|
| in5-5k   | 1-ethyl-6-fluoro-7-(4-(5-(4-nitrophenyl)-1,3,4-thiadiazol-2-yl)piperazin-1-yl)-4-oxo-1,2,3,4-tetrahydroquinoline-3-carboxylic acid          |  | Idem                                                                                                                                                                                                                                                                                                              |
| in5-5l   | 1-ethyl-6-fluoro-7-(4-(5-(4-nitrophenyl)-1,3,4-thiadiazol-2-yl)piperazin-1-yl)-4-oxo-1,2,3,4-tetrahydro-1,8-naphthyridine-3-carboxylic acid |  | Idem                                                                                                                                                                                                                                                                                                              |
| 25aArt13 | 9-fluoro-3-methyl-10-(3-methylpiperazin-1-yl)-7-oxo-3,7-dihydro-2H-[1,4]oxazino[2,3,4-ij]quinoline-6-carboxylic acid                        |  | Liu B, Yang CH, Xu GY, Zhu YH, Cui JR, Wu XH, Xie YY. Syntheses of quinolone hydrochloride enantiomers from synthons (R)- and (S)-2-methylpiperazine. <i>Bioorg. Med. Chem.</i> <b>2005</b> ; 13(7): 2451-8.                                                                                                      |
| in8-4a   | 7-(4-(5-(benzylsulfonyl)-1,3,4-thiadiazol-2-yl)piperazin-1-yl)-1-ethyl-6-fluoro-4-oxo-1,4-dihydroquinoline-3-carboxylic acid                |  | Foroumadi A, Emami S, Hassanzadeh A, Rajaei M, Sokhanvar K, Moshafi MH, Shafiei A. Synthesis and antibacterial activity of N-(5-benzylthio-1,3,4-thiadiazol-2-yl) and N-(5-benzylsulfonyl-1,3,4-thiadiazol-2-yl)piperazinyl quinolone derivatives. <i>Bioorg. Med. Chem. Lett.</i> <b>2005</b> ; 15(20): 4488-92. |
| in8-4b   | 1-ethyl-6-fluoro-7-(4-(5-((2-nitrobenzyl)sulfonyl)-1,3,4-thiadiazol-2-yl)piperazin-1-yl)-4-oxo-1,4-dihydroquinoline-3-carboxylic acid       |  | Idem                                                                                                                                                                                                                                                                                                              |

|          |                                                                                                                                       |  |                                                                                                                                                                                                                                                                                  |
|----------|---------------------------------------------------------------------------------------------------------------------------------------|--|----------------------------------------------------------------------------------------------------------------------------------------------------------------------------------------------------------------------------------------------------------------------------------|
| in8-4c   | 1-ethyl-6-fluoro-7-(4-(5-((3-nitrobenzyl)sulfonyl)-1,3,4-thiadiazol-2-yl)piperazin-1-yl)-4-oxo-1,4-dihydroquinoline-3-carboxylic acid |  | Idem                                                                                                                                                                                                                                                                             |
| in7pge52 | 1-methyl-4-oxo-1,4-dihydroquinoline-3-carboxylic acid                                                                                 |  | Macinga DR, Renick PJ, Makin KM, Ellis DH, Kreiner AA, Li M, Rupnik KJ, Kincaid EM, Wallace CD, Ledoussal B, Morris TW.<br>Unique Biological Properties and Molecular Mechanism of 5,6-Bridged Quinolones.<br><i>Antimicrob. Agents Chemother.</i> <b>2003</b> ; 47(8): 2526-37. |
| in7pge61 | 7,8-dimethyl-10-oxo-7,10-dihydro-1H-[1,3]dioxino[5,4-f]quinoline-9-carboxylic acid                                                    |  | Idem                                                                                                                                                                                                                                                                             |
