# Supplementary material for: Molecular Topology for the Search of New Anti-MRSA Compounds
Source: MDPI journal article supplement (doi:10.3390/ijms22115823), 2021-05-29
Supplement: s1 [file s1]

**Table S1. Active group used in the discriminant functions: Paper name/code, IUPAC name, structure and bibliographic references about activity for each compound.**

| Paper name/code | IUPAC name                                                                                                   | Structure                                                                            | References                                                                                                                                                                                                                                                                                                                                                                                                                    |
|-----------------|--------------------------------------------------------------------------------------------------------------|--------------------------------------------------------------------------------------|-------------------------------------------------------------------------------------------------------------------------------------------------------------------------------------------------------------------------------------------------------------------------------------------------------------------------------------------------------------------------------------------------------------------------------|
| 11act4          | 3-(9-cyclopropyl-6-fluoro-3,4-dioxo-2,3,4,9-tetrahydroisothiazolo[5,4-b]quinolin-7-yl)benzonitrile           | 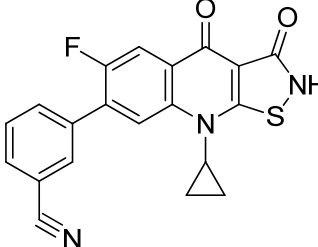   | Wiles JA, Wang Q, Lucien E, Hashimoto A, Song Y, Cheng J, Marlor CW, Ou Y, Podos SD, Thanassi JA, Thoma CL, Deshpande M, Pucci MJ, Bradbury BJ. Isothiazoloquinolones containing functionalized aromatic hydrocarbons at the 7-position: synthesis and in vitro activity of a series of potent antibacterial agents with diminished cytotoxicity in human cells. <i>Bioorg. Med. Chem. Lett.</i> <b>2006</b> ; 16(5): 1272-6. |
| 13act4          | 2-(4-(9-cyclopropyl-6-fluoro-3,4-dioxo-2,3,4,9-tetrahydroisothiazolo[5,4-b]quinolin-7-yl)phenyl)acetonitrile |   | Idem                                                                                                                                                                                                                                                                                                                                                                                                                          |
| 15act4          | 9-cyclopropyl-6-fluoro-7-(3-fluorophenyl)isothiazolo[5,4-b]quinoline-3,4(2H,9H)-dione                        |  | Idem                                                                                                                                                                                                                                                                                                                                                                                                                          |
| 17act4          | 9-cyclopropyl-6-fluoro-7-(3-hydroxyphenyl)isothiazolo[5,4-b]quinoline-3,4(2H,9H)-dione                       |  | Idem                                                                                                                                                                                                                                                                                                                                                                                                                          |
| 18act4          | 9-cyclopropyl-6-fluoro-7-(4-hydroxyphenyl)isothiazolo[5,4-b]quinoline-3,4(2H,9H)-dione                       |  | Idem                                                                                                                                                                                                                                                                                                                                                                                                                          |
| 22act4          | 9-cyclopropyl-6-fluoro-7-(4-hydroxy-3-methoxyphenyl)isothiazolo[5,4-b]quinoline-3,4(2H,9H)-dione             |  | Idem                                                                                                                                                                                                                                                                                                                                                                                                                          |

|        |                                                                                                                          |                                                                                      |                                                                                                                                                                                                                                                                                                                                                                                                                                                               |
|--------|--------------------------------------------------------------------------------------------------------------------------|--------------------------------------------------------------------------------------|---------------------------------------------------------------------------------------------------------------------------------------------------------------------------------------------------------------------------------------------------------------------------------------------------------------------------------------------------------------------------------------------------------------------------------------------------------------|
| 28act4 | 7-(4-aminophenyl)-9-cyclopropyl-6-fluoroisothiazolo[5,4- <i>b</i> ]quinoline-3,4(2 <i>H</i> ,9 <i>H</i> )-dione          | 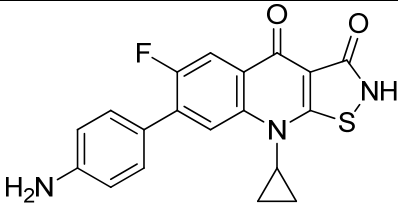   | Idem                                                                                                                                                                                                                                                                                                                                                                                                                                                          |
| 30act4 | 7-(3-amino-4-fluorophenyl)-9-cyclopropyl-6-fluoroisothiazolo[5,4- <i>b</i> ]quinoline-3,4(2 <i>H</i> ,9 <i>H</i> )-dione |    | Idem                                                                                                                                                                                                                                                                                                                                                                                                                                                          |
| 4act5  | 9-cyclopropyl-6-fluoro-7-(pyridin-4-yl)isothiazolo[5,4- <i>b</i> ]quinoline-3,4(2 <i>H</i> ,9 <i>H</i> )-dione           |    | Wiles JA, Song Y, Wang Q, Lucien E, Hashimoto A, Cheng J, Marlor CW, Ou Y, Podos SD, Thanassi JA, Thoma CL, Deshpande M, Pucci MJ, Bradbury BJ. Biological evaluation of isothiazoloquinolones containing aromatic heterocycles at the 7-position: In vitro activity of a series of potent antibacterial agents that are effective against methicillin-resistant <i>Staphylococcus aureus</i> . <i>Bioorg. Med. Chem. Lett.</i> <b>2006</b> ; 16(5): 1277-81. |
| 10act5 | 9-cyclopropyl-6-fluoro-7-(2-methylpyridin-3-yl)isothiazolo[5,4- <i>b</i> ]quinoline-3,4(2 <i>H</i> ,9 <i>H</i> )-dione   |  | Idem                                                                                                                                                                                                                                                                                                                                                                                                                                                          |
| 11act5 | 9-cyclopropyl-6-fluoro-7-(6-methylpyridin-3-yl)isothiazolo[5,4- <i>b</i> ]quinoline-3,4(2 <i>H</i> ,9 <i>H</i> )-dione   |  | Idem                                                                                                                                                                                                                                                                                                                                                                                                                                                          |
| 14act5 | 9-cyclopropyl-6-fluoro-7-(2-fluoropyridin-4-yl)isothiazolo[5,4- <i>b</i> ]quinoline-3,4(2 <i>H</i> ,9 <i>H</i> )-dione   |  | Idem                                                                                                                                                                                                                                                                                                                                                                                                                                                          |
| 19act5 | 9-cyclopropyl-6-fluoro-7-(2-methylpyridin-4-yl)isothiazolo[5,4- <i>b</i> ]quinoline-3,4(2 <i>H</i> ,9 <i>H</i> )-dione   |  | Idem                                                                                                                                                                                                                                                                                                                                                                                                                                                          |

|         |                                                                                                                                            |  |                                                                                                                                                                                                                                                                                                   |
|---------|--------------------------------------------------------------------------------------------------------------------------------------------|--|---------------------------------------------------------------------------------------------------------------------------------------------------------------------------------------------------------------------------------------------------------------------------------------------------|
| 21act5  | 9-cyclopropyl-7-(2,6-dimethylpyridin-4-yl)-6-fluoroisothiazolo[5,4-b]quinoline-3,4(2H,9H)-dione                                            |  | Idem                                                                                                                                                                                                                                                                                              |
| 28act5  | 9-cyclopropyl-7-(2,4-dimethoxypyrimidin-5-yl)-6-fluoroisothiazolo[5,4-b]quinoline-3,4(2H,9H)-dione                                         |  | Idem                                                                                                                                                                                                                                                                                              |
| 34act5  | 9-cyclopropyl-6-fluoro-7-(isoquinolin-6-yl)isothiazolo[5,4-b]quinoline-3,4(2H,9H)-dione                                                    |  | Idem                                                                                                                                                                                                                                                                                              |
| 35act5  | 9-cyclopropyl-6-fluoro-7-(quinolin-6-yl)isothiazolo[5,4-b]quinoline-3,4(2H,9H)-dione                                                       |  | Idem                                                                                                                                                                                                                                                                                              |
| 5j-act1 | (E)-1-cyclopropyl-7-(4-(2-(2,4-dichlorophenyl)-2-(methoxyimino)ethyl)piperazin-1-yl)-6-fluoro-4-oxo-1,4-dihydroquinoline-3-carboxylic acid |  | Foroumadi A, Ghodsi S, Emami S, Najjari S, Samadi N, Faramarzi MA, Beikmohammadi L, Shirazi FH, Shafiee A. Synthesis and antibacterial activity of new fluoroquinolones containing a substituted N-(phenethyl)piperazine moiety. <i>Bioorg. Med. Chem. Lett.</i> <b>2006</b> ; 16(13): 3499-3503. |
| 5m-act1 | (E)-7-(4-(2-(2-chlorophenyl)-2-(methoxyimino)ethyl)piperazin-1-yl)-1-cyclopropyl-6-fluoro-4-oxo-1,4-dihydroquinoline-3-carboxylic acid     |  | Idem                                                                                                                                                                                                                                                                                              |

|         |                                                                                                                                        |                                                                                      |      |
|---------|----------------------------------------------------------------------------------------------------------------------------------------|--------------------------------------------------------------------------------------|------|
| 5n-act1 | (E)-7-(4-(2-(4-chlorophenyl)-2-(methoxyimino)ethyl)piperazin-1-yl)-1-cyclopropyl-6-fluoro-4-oxo-1,4-dihydroquinoline-3-carboxylic acid | 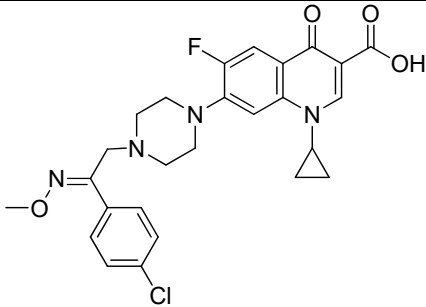   | Idem |
| 5o-act1 | 7-(4-(2-(2-chlorophenyl)-2-oxoethyl)piperazin-1-yl)-1-cyclopropyl-6-fluoro-4-oxo-1,4-dihydroquinoline-3-carboxylic acid                |    | Idem |
| 5p-act1 | 7-(4-(2-(4-chlorophenyl)-2-oxoethyl)piperazin-1-yl)-1-cyclopropyl-6-fluoro-4-oxo-1,4-dihydroquinoline-3-carboxylic acid                |   | Idem |
| 5q-act1 | (E)-7-(4-(2-(2-chlorophenyl)-2-(hydroxyimino)ethyl)piperazin-1-yl)-1-cyclopropyl-6-fluoro-4-oxo-1,4-dihydroquinoline-3-carboxylic acid |  | Idem |
| 5r-act1 | (E)-7-(4-(2-(4-chlorophenyl)-2-(hydroxyimino)ethyl)piperazin-1-yl)-1-cyclopropyl-6-fluoro-4-oxo-1,4-dihydroquinoline-3-carboxylic acid |  | Idem |

|              |                                                                                                                                           |                                                                                    |                                                                                                                                                                                                                                                          |
|--------------|-------------------------------------------------------------------------------------------------------------------------------------------|------------------------------------------------------------------------------------|----------------------------------------------------------------------------------------------------------------------------------------------------------------------------------------------------------------------------------------------------------|
| DX-619       | 7-((R)-3-(1-aminocyclopropyl)pyrrolidin-1-yl)-1-((1R,2S)-2-fluorocyclopropyl)-8-methoxy-4-oxo-1,4-dihydroquinoline-3-carboxylic acid      | 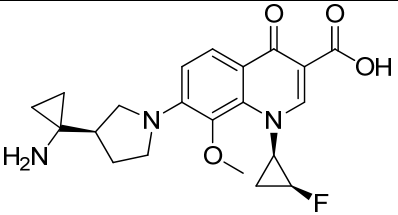 | <p>Fujikawa K, Chiba M, Tanaka M, Sato K. In vitro antibacterial activity of DX-619, a novel des-fluoro(6) quinolone. <i>Antimicrob. Agents Chemother.</i> <b>2005</b>; 49(7): 3040-5.</p>                                                               |
| Sitaflaxacin | 7-((S)-7-amino-5-azaspiro[2.4]heptan-5-yl)-8-chloro-6-fluoro-1-((1S,2R)-2-fluorocyclopropyl)-4-oxo-1,4-dihydroquinoline-3-carboxylic acid |  | <p>Milatovic D, Schmitz FJ, Brisse S, Verhoef J, Fluit AC. In Vitro Activities of Sitaflaxacin (DU-6859a) and Six Other Fluoroquinolones against 8,796 Clinical Bacterial Isolates. <i>Antimicrob. Agents Chemother.</i> <b>2000</b>; 44(4): 1102-7.</p> |
